# Supplementary material
Source: Research Square preprint supplement (doi:10.21203/rs.3.rs-8870994/v1)
Supplement: Supplementary file 1 [file 9156f0e3285b60a1a0135472.docx]

**Antagonistic SUMOylation and** **Ubiquitination of ACSL4**

**Control Ferroptosis in Colorectal Cancer**

Jiakun Zhang1,4, Shengjie Feng1,2,4, Guang Shi1, Haokun Zhang1, Wenli Zhan1, Wenkai Fu1, Haijie Li1, Anding Wu3, Guihua Wang1, Junbo Hu1 and Xuelai Luo1#

1, GI Cancer Research Institute, Tongji Hospital, Huazhong University of Science and Technology, Wuhan, 430030, P. R. China.

2, Department of Thyroid Surgery, The First Affifiliated Hospital, School of Medicine, Zhejiang University, Hangzhou, 310006, P. R. China.

3, Department of Gastrointestinal Surgery, Huanggang Central Hospital, Huanggang, China

4, These authors contributed equally: Jiakun Zhang, Shengjie Feng

**# To whom all correspondence should be sent:**

**Xuelai Luo,** GI Cancer Research Institute, Tongji Hospital, Huazhong University of Science and Technology, Wuhan, 430030, China; Phone: 13807148373; E-mail: [Luoxl@tjh.tjmu.edu.cn](mailto:Luoxl@tjh.tjmu.edu.cn)

**
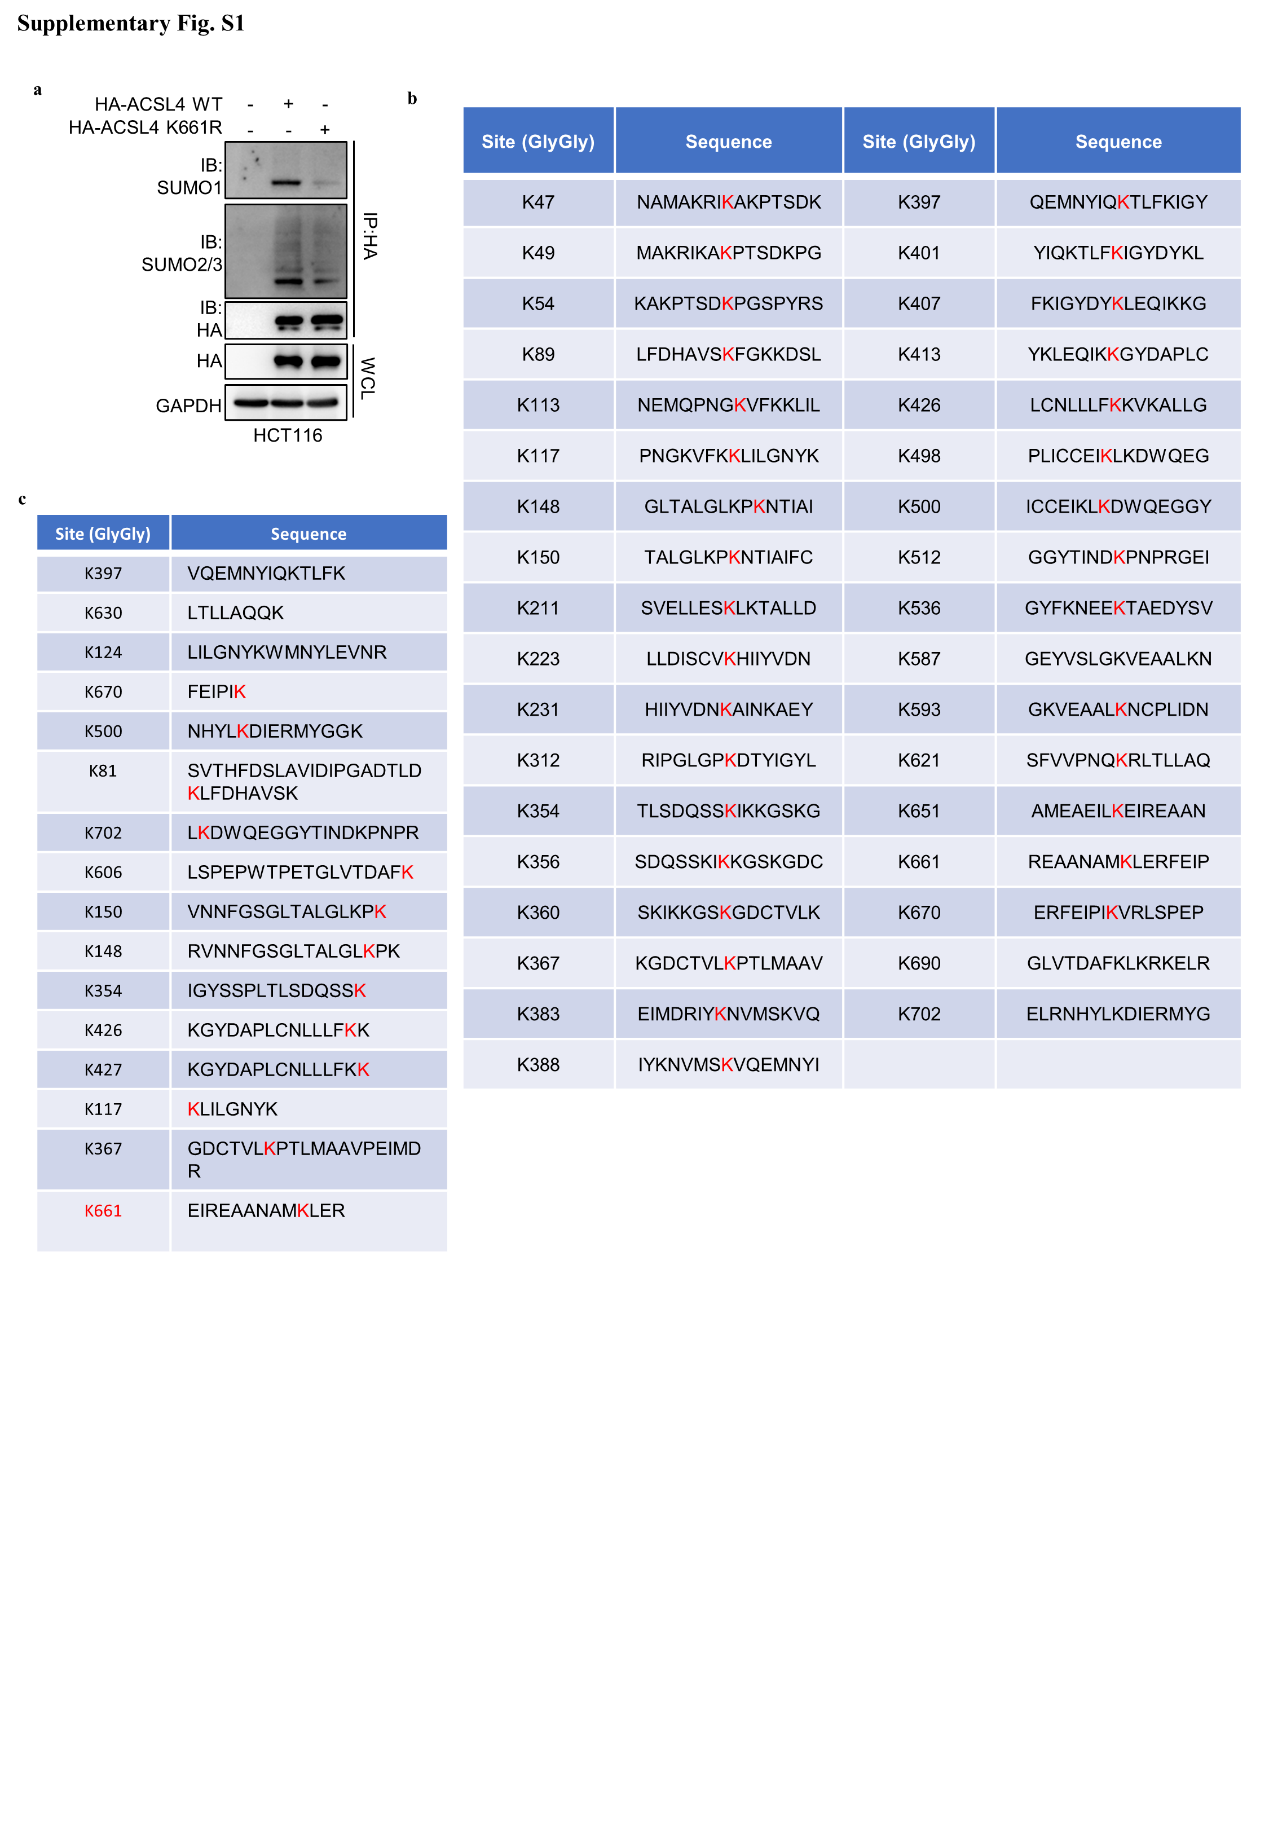
**

**Supplementary Fig. S1. ACSL4 can undergo SUMOylation at K661.**

(a) Co-IP analysis of cell lysates from HCT116 cells transfected with the indicated plasmids. (b) Prediction of potential ubiquitination sites of ACSL4 based on PhosphoSitePlus® PTM analysis. (c) Identification of ACSL4 ubiquitination sites by mass spectrometry.


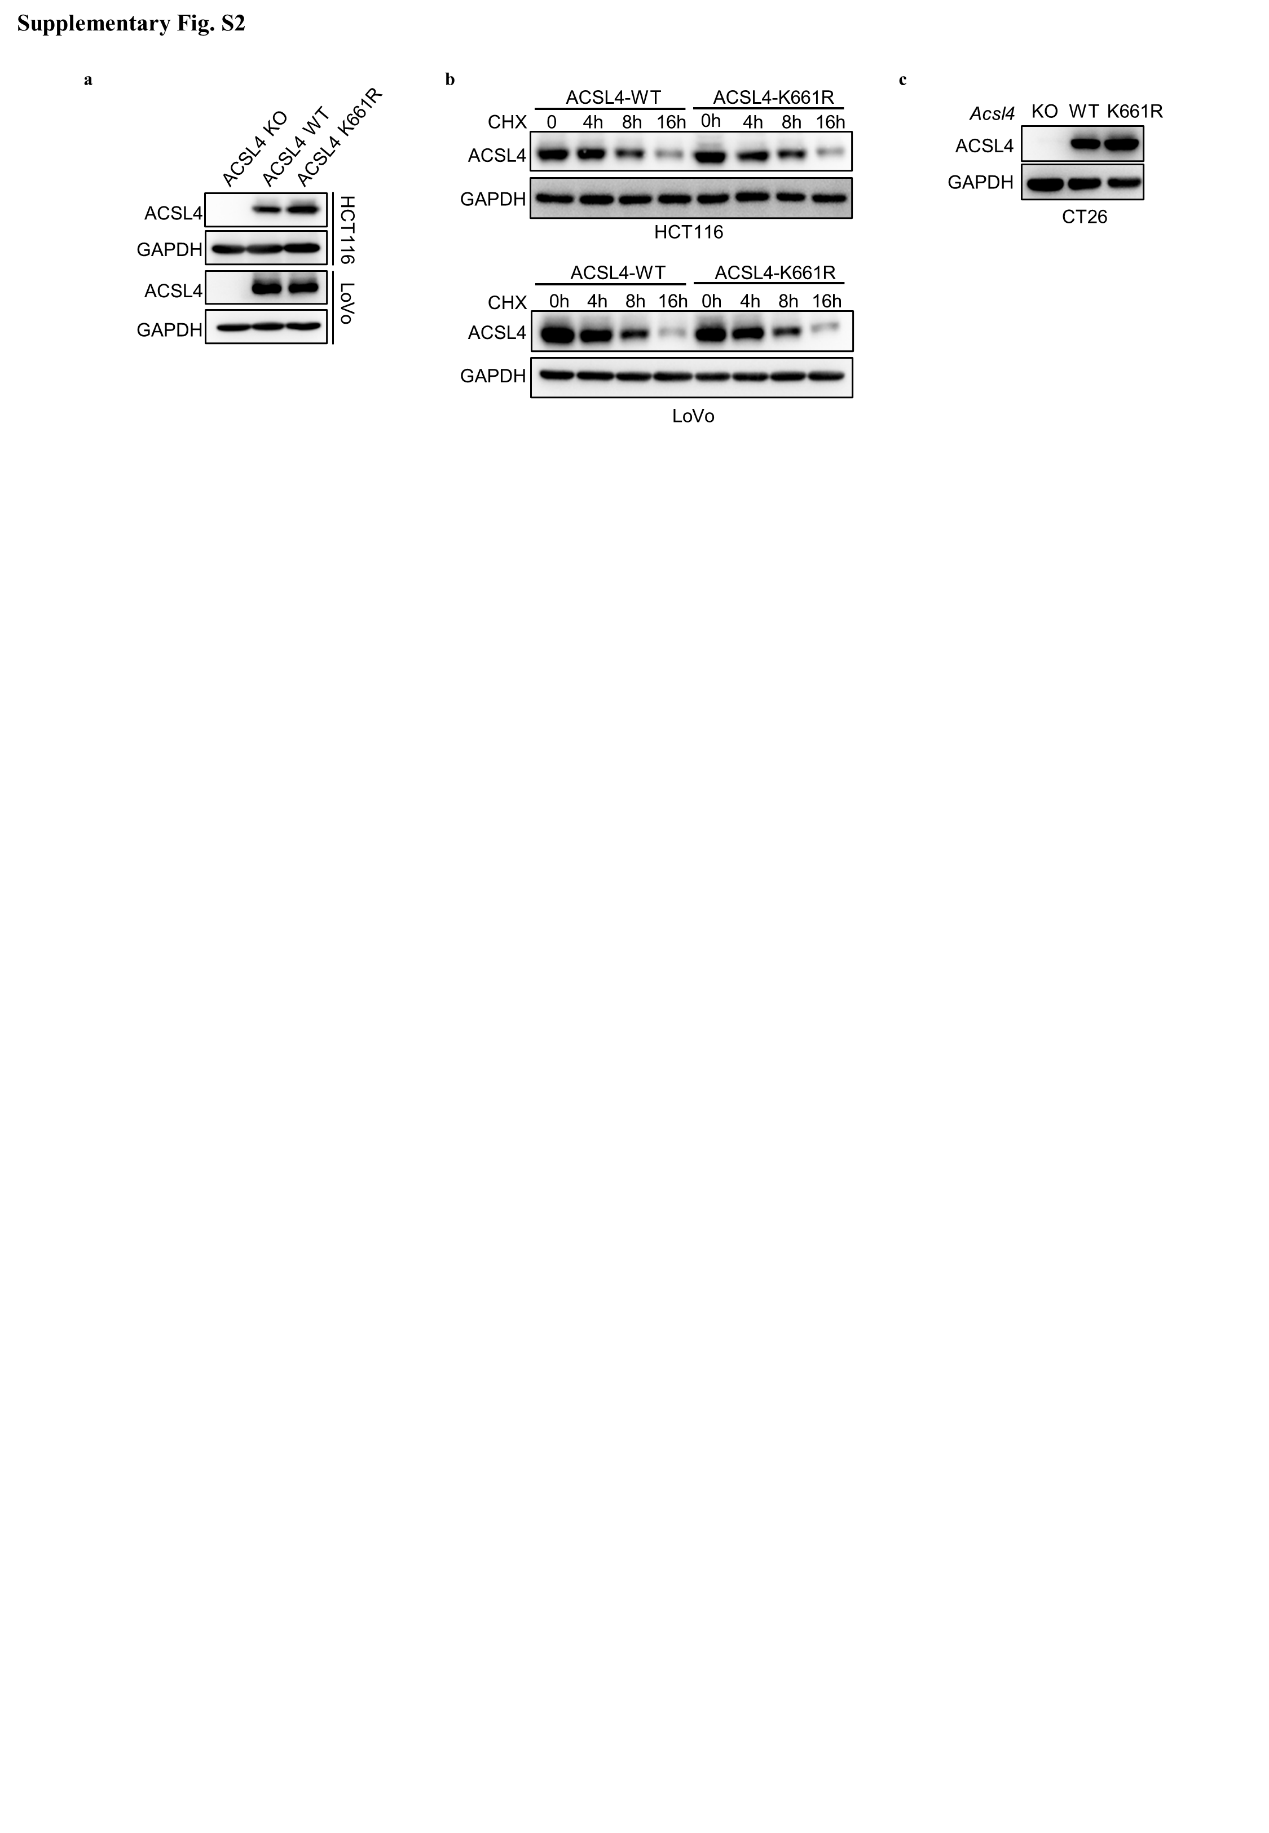


**Supplementary Fig. S2. ACSL4 K661 SUMOylation regulates ACSL4 dimerization and ferroptosis.**

(a) Western blot analysis of ACSL4 WT and ACSL4 K661R stable LoVo and HCT116 cells. Protein levels of ACSL4 were respective assayed. (b) ACSL4 degradation in ACSL4 WT and ACSL4 K661R stable LoVo and HCT116 cells after treatment with CHX (100 μg/ml) for 0, 4, 8, and 12 h, as assessed by the CHX-chase assay. (c) Western blot analysis of ACSL4 WT and ACSL4 K661R stable CT26 cells. Protein levels of ACSL4 were respective assayed.


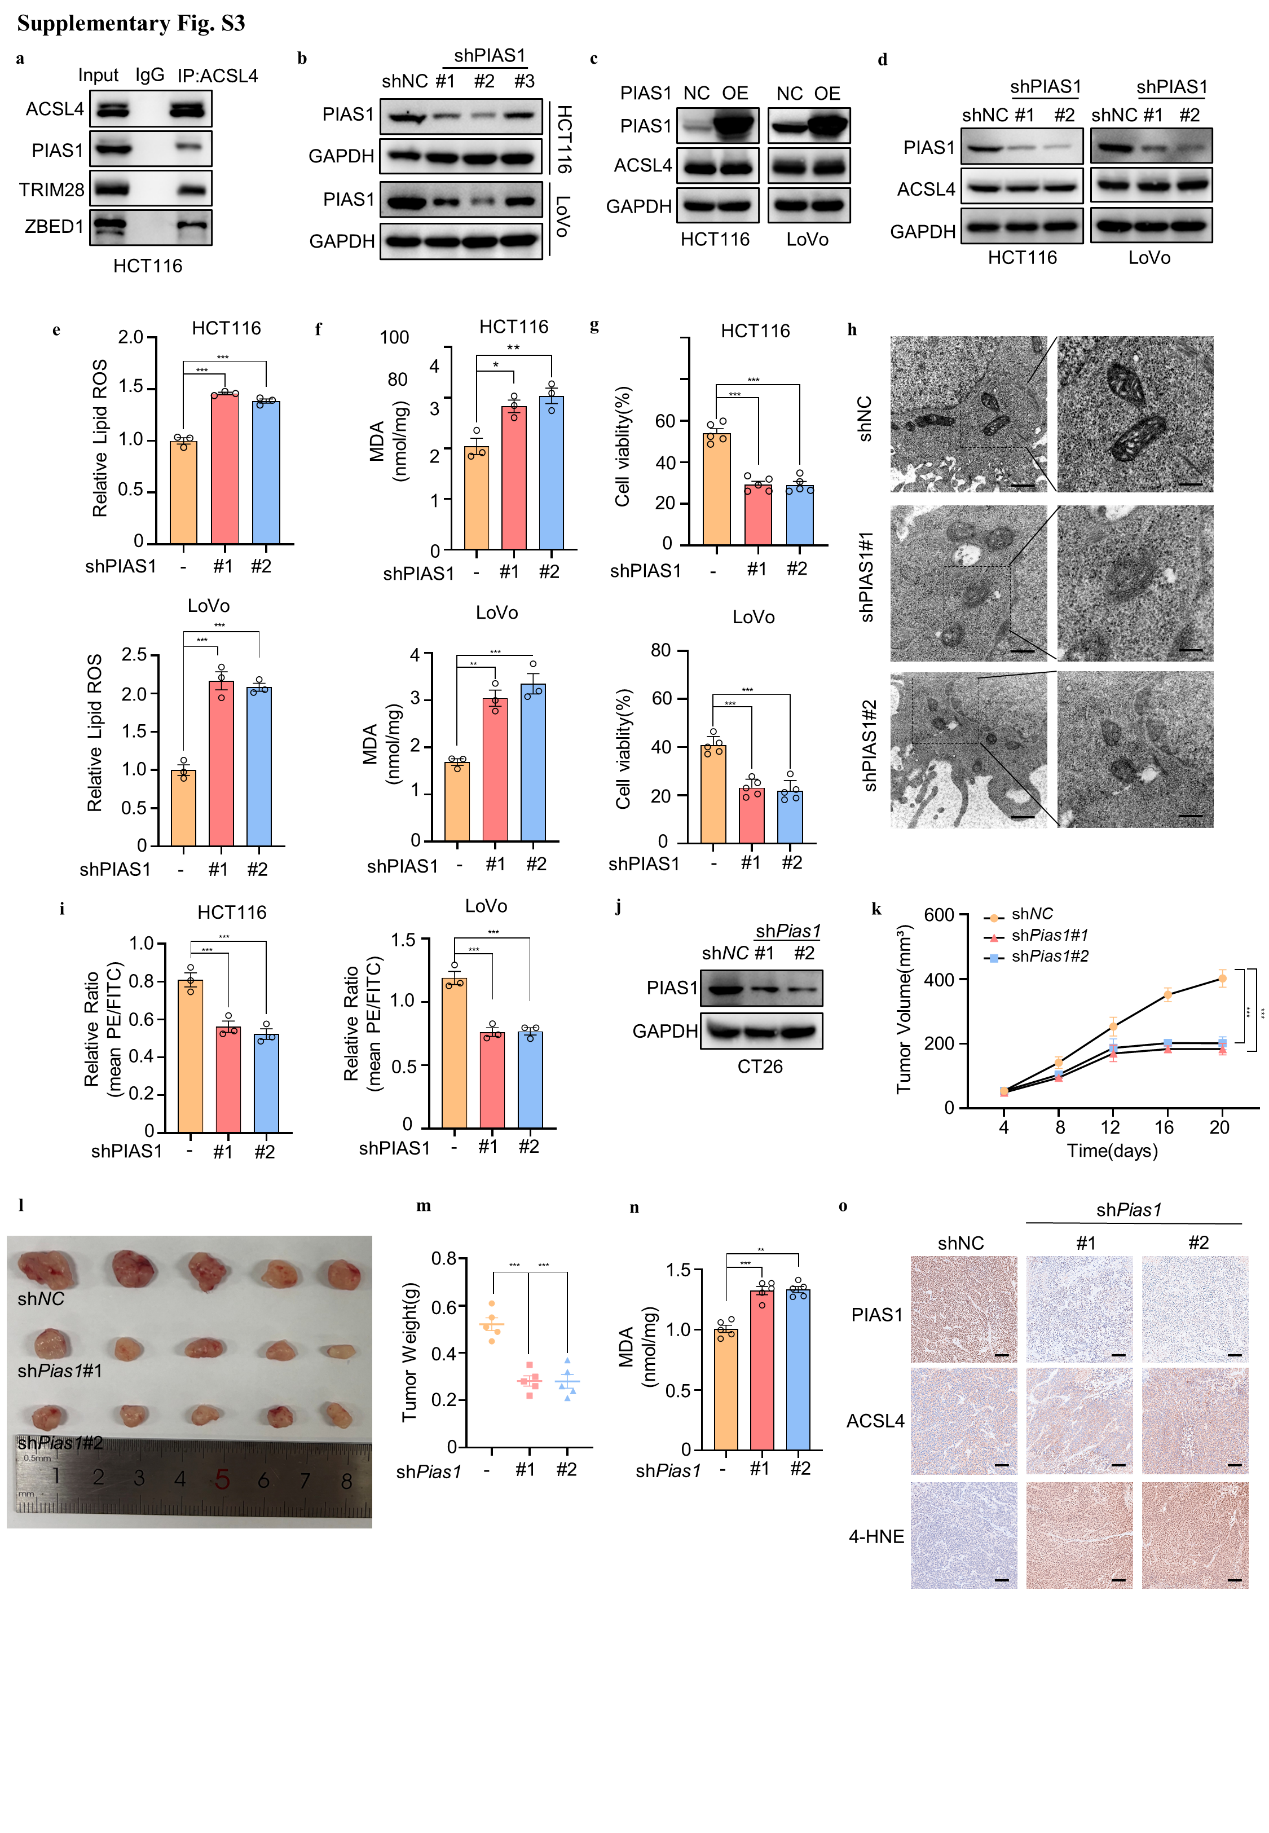


**Supplementary Fig. S3. PIAS1 mediates ACSL4 SUMOylation in colorectal cancer.** (a) Co-IP analysis of the interaction between ACSL4 and the indicated SUMO E3 ligases in HCT116 cells. (b) Western blot analysis of PIAS1-knockdown LoVo and HCT116 cells. (c, d) Western blot analysis of PIAS1-OE or PIAS1-KD LoVo and HCT116 cells. ACSL4 protein levels were assessed accordingly. PIAS1 OE (c); PIAS1 KD (d). (e) Relative lipid ROS levels were measured in the indicated stable LoVo and HCT116 cells treated with 2.5 μM RSL3 for 8 h (n = 3 independent experiments). (f) Cell viability was assayed in the indicated stable LoVo and HCT116 cells treated with 2.5 μM RSL3 for 8 h (n = 5 independent experiments). (g) MDA levels were measured in the indicated stable LoVo and HCT116 cells treated with 2.5 μM RSL3 for 8 h (n = 3 independent experiments). (h) TEM images of the indicated stable HCT116 cells treated with 2.5 μM RSL3 for 8 h. Scale bars: left, 2 μm; right, 500 nm. (i) The indicated LoVo and HCT116 cells were treated with 2.5 μM RSL3 for 8 h and used to evaluate mitochondrial membrane potential by JC-1 fluorescence staining (n = 3 independent experiments). (j) Generation of PIAS1-stable KD CT26 cell lines and Western blot analysis of PIAS1-KD LoVo and HCT116 cells. (k–m) The indicated stable CT26 cells were subcutaneously injected into BALB/c mice, and the mice were treated with intratumoral injection of RSL3 (100 mg/kg, twice per week). Tumor growth curve (k); tumor image (l); tumor weight (m) (n = 5 biologically independent samples). (n) MDA levels in tumor cells isolated from (l) were assayed (n = 5 independent experiments). (o) Representative IHC images of ACSL4, PIAS1, and 4-HNE in tumor sections. Scale bars, 20 μm. Data are presented as mean ± SEM. Comparisons were made by using one-way ANOVA with Tukey’s test; **p* < 0.05; ***p* < 0.01;****p* < 0.001.


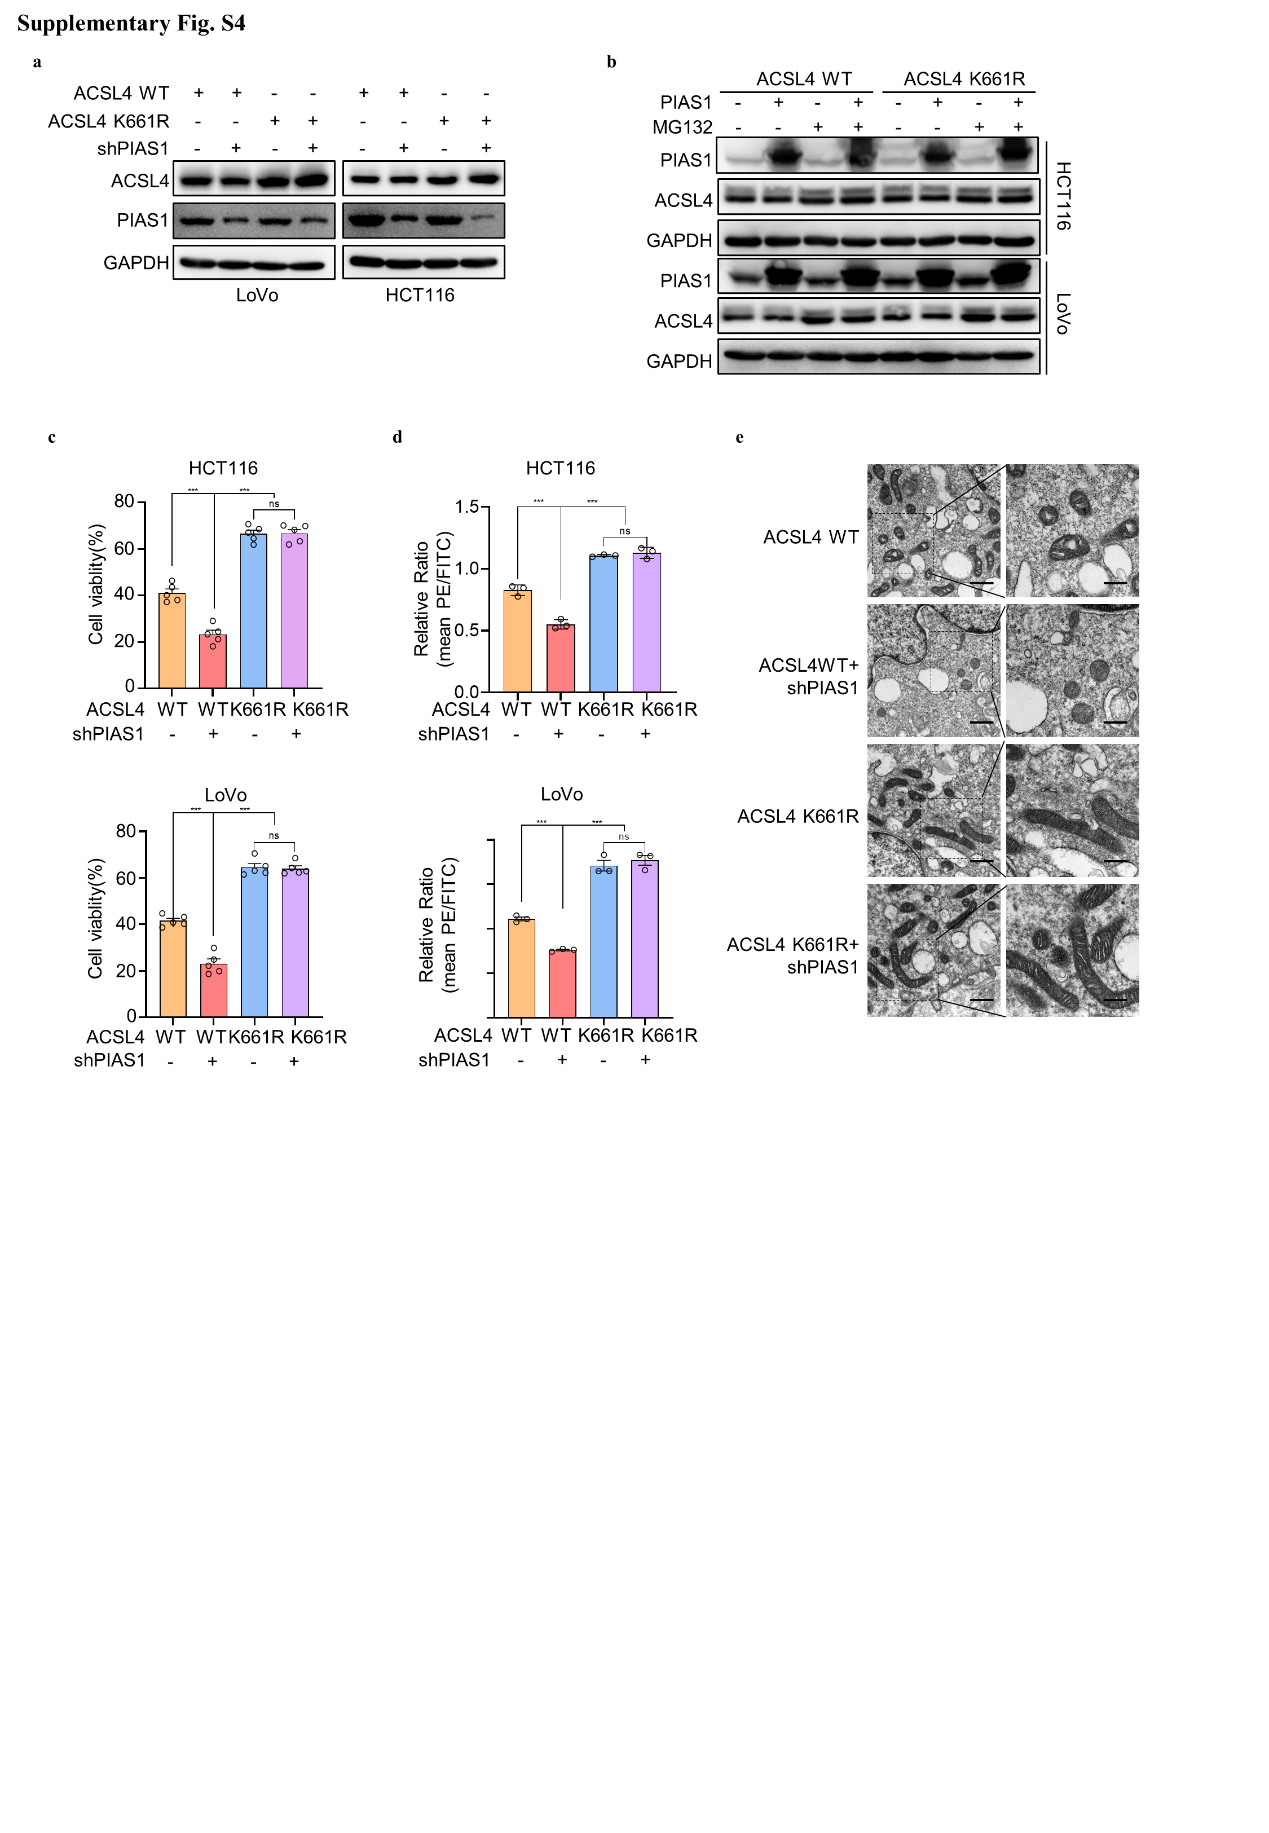


**Supplementary Fig. S4. SUMOylation of ACSL4 at K661 is required for PIAS1-mediated regulation of ferroptosis**

(a) Western blot analysis of the indicated LoVo and HCT116 cells. Protein levels of PIAS1 and ACSL4 were assessed. (b) Western blot analysis of vector and PIAS1-OE LoVo and HCT116 cells treated with 10 μM MG132 for 8 h. Protein levels of PIAS1 and ACSL4 were assessed. (c) Cell viability was assayed in the indicated LoVo and HCT116 cells treated with 2.5 μM RSL3 for 8 h. (n = 5 independent experiments). (d) The indicated LoVo and HCT116 cells were treated with 2.5 μM RSL3 for 8 h and used to evaluate mitochondrial membrane potential by JC-1 fluorescence staining (n = 3 independent experiments). (e) TEM images of the indicated HCT116 cells subjected with 2.5 μM RSL3 for 8 h. Scale bars: left, 2 μm; right, 500 nm. Data are presented as mean ± SEM. Comparisons were made by using one-way ANOVA with Tukey’s test; ****p* < 0.001. ns, not significant.


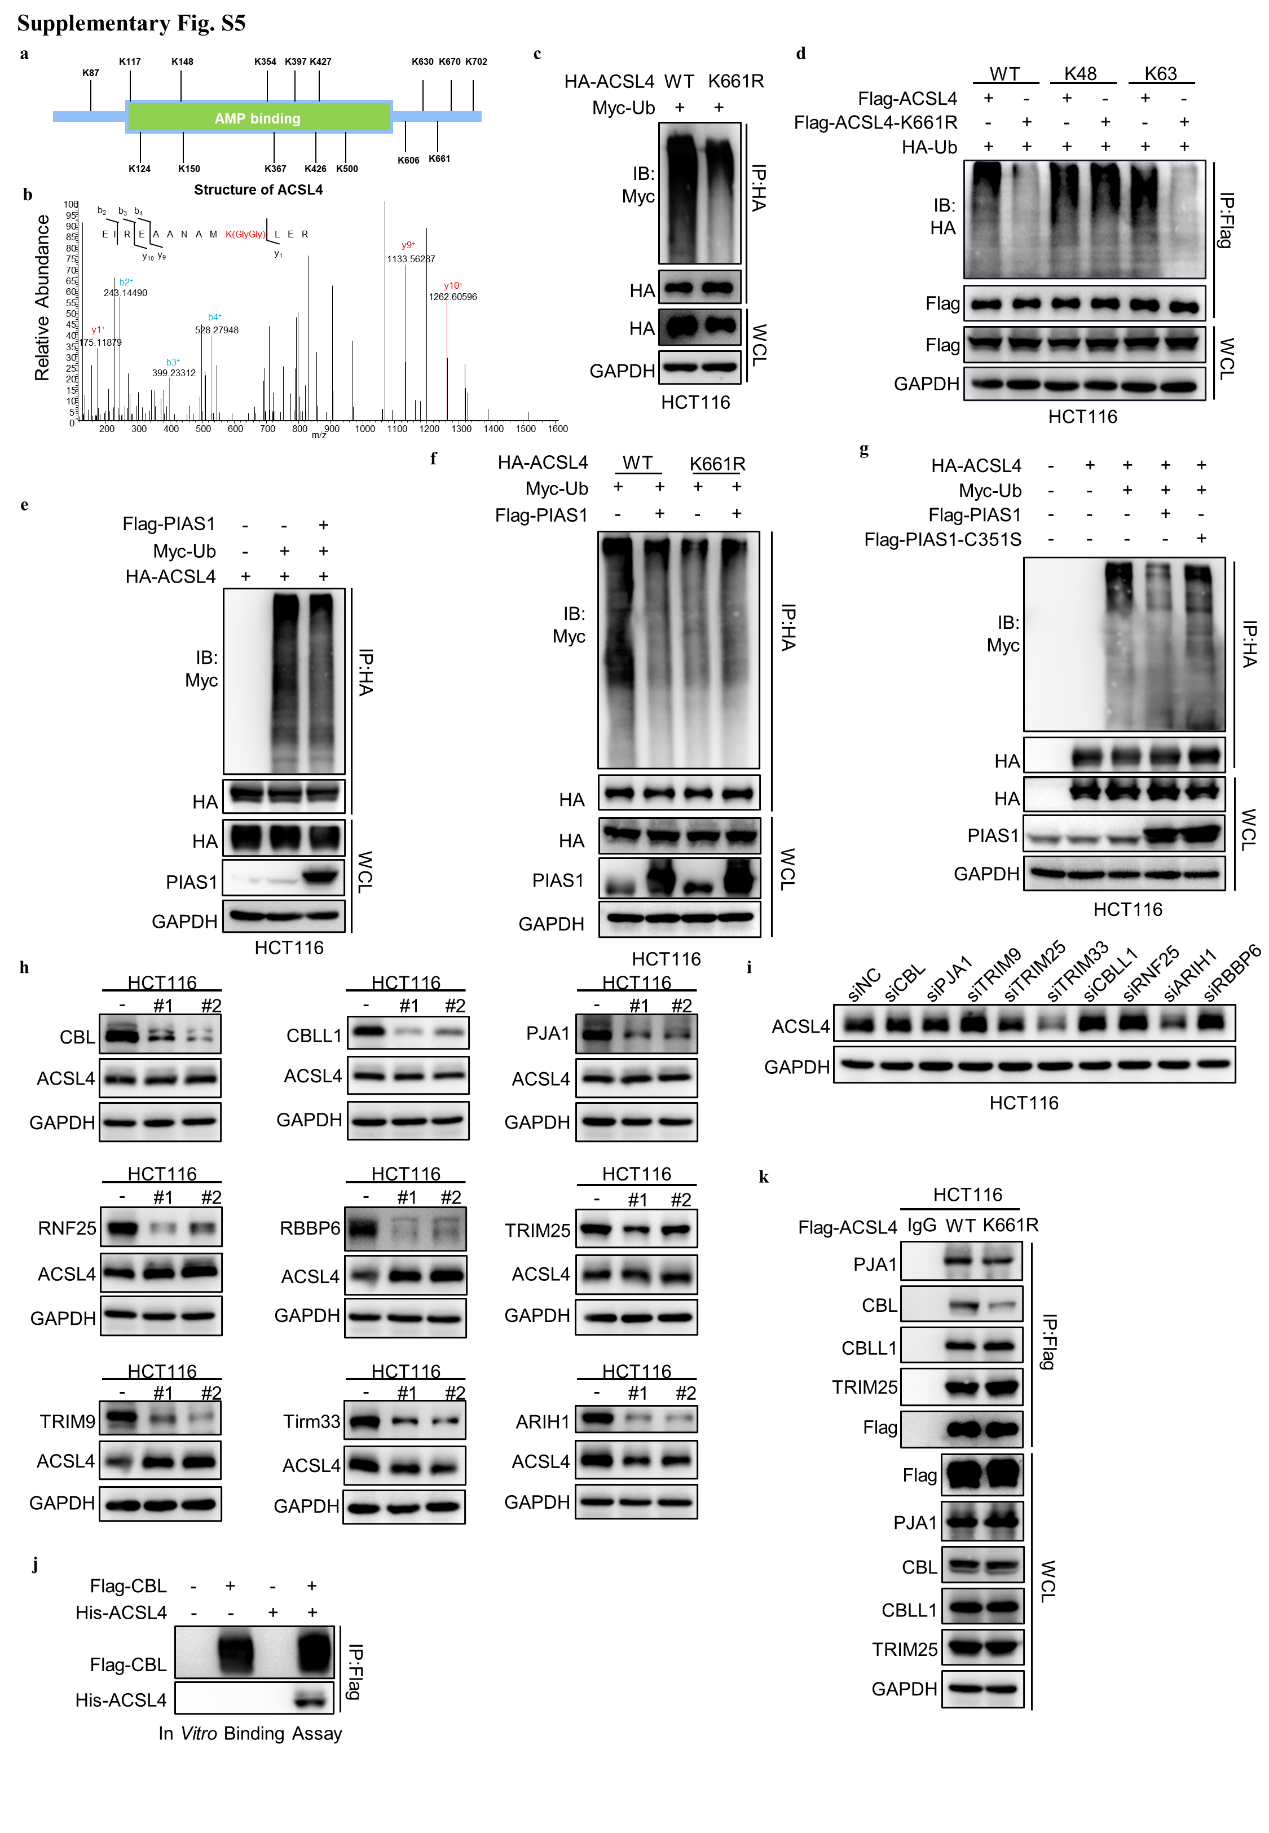


**Supplementary Fig. S5. Inhibition of ACSL4 SUMOylation enhances ACSL4** **ubiquitination****.** (a) Schematic diagram of ACSL4 structure and putative ubiquitination sites. (b) Secondary mass spectrometry analysis identifying potential ubiquitination at lysine 661 of ACSL4. (c) HCT116 cells were transfected with the indicated plasmids and treated with MG132 (10 μM) for 8 h. IP was performed to analyze ubiquitination of ACSL4 WT and K661R mutant. (d) HCT116 cells were transfected with the indicated plasmids and treated with MG132 (10 μM) for 8 h. IP was performed to determine the ubiquitin linkage type at the K661 site of ACSL4. (e) HCT116 cells were transfected with the indicated plasmids and treated with MG132 (10 μM) for 8 h. IP was performed to examine ACSL4 ubiquitination in the presence or absence of PIAS1 OE. (f) HCT116 cells were transfected with the indicated plasmids and treated with MG132 (10 μM) for 8 h. IP was performed to analyze ubiquitination of ACSL4 WT and the K661R mutant with or without PIAS1 OE. (g) HCT116 cells were transfected with the indicated plasmids and treated with MG132 (10 μM) for 8 h. IP was performed to assess changes in ACSL4 ubiquitination. (h, i) Western blot analysis of HCT116 cells transfected with the indicated E3 ubiquitin ligase siRNAs. ACSL4 protein levels were assessed. (j) In vitro pull-down assay was performed to validate the interaction between CBL and ACSL4. (k) Co-IP analyses were performed to examine interaction changes between ACSL4 WT or ACSL4 K661R and the indicated E3 ubiquitin ligase.

**
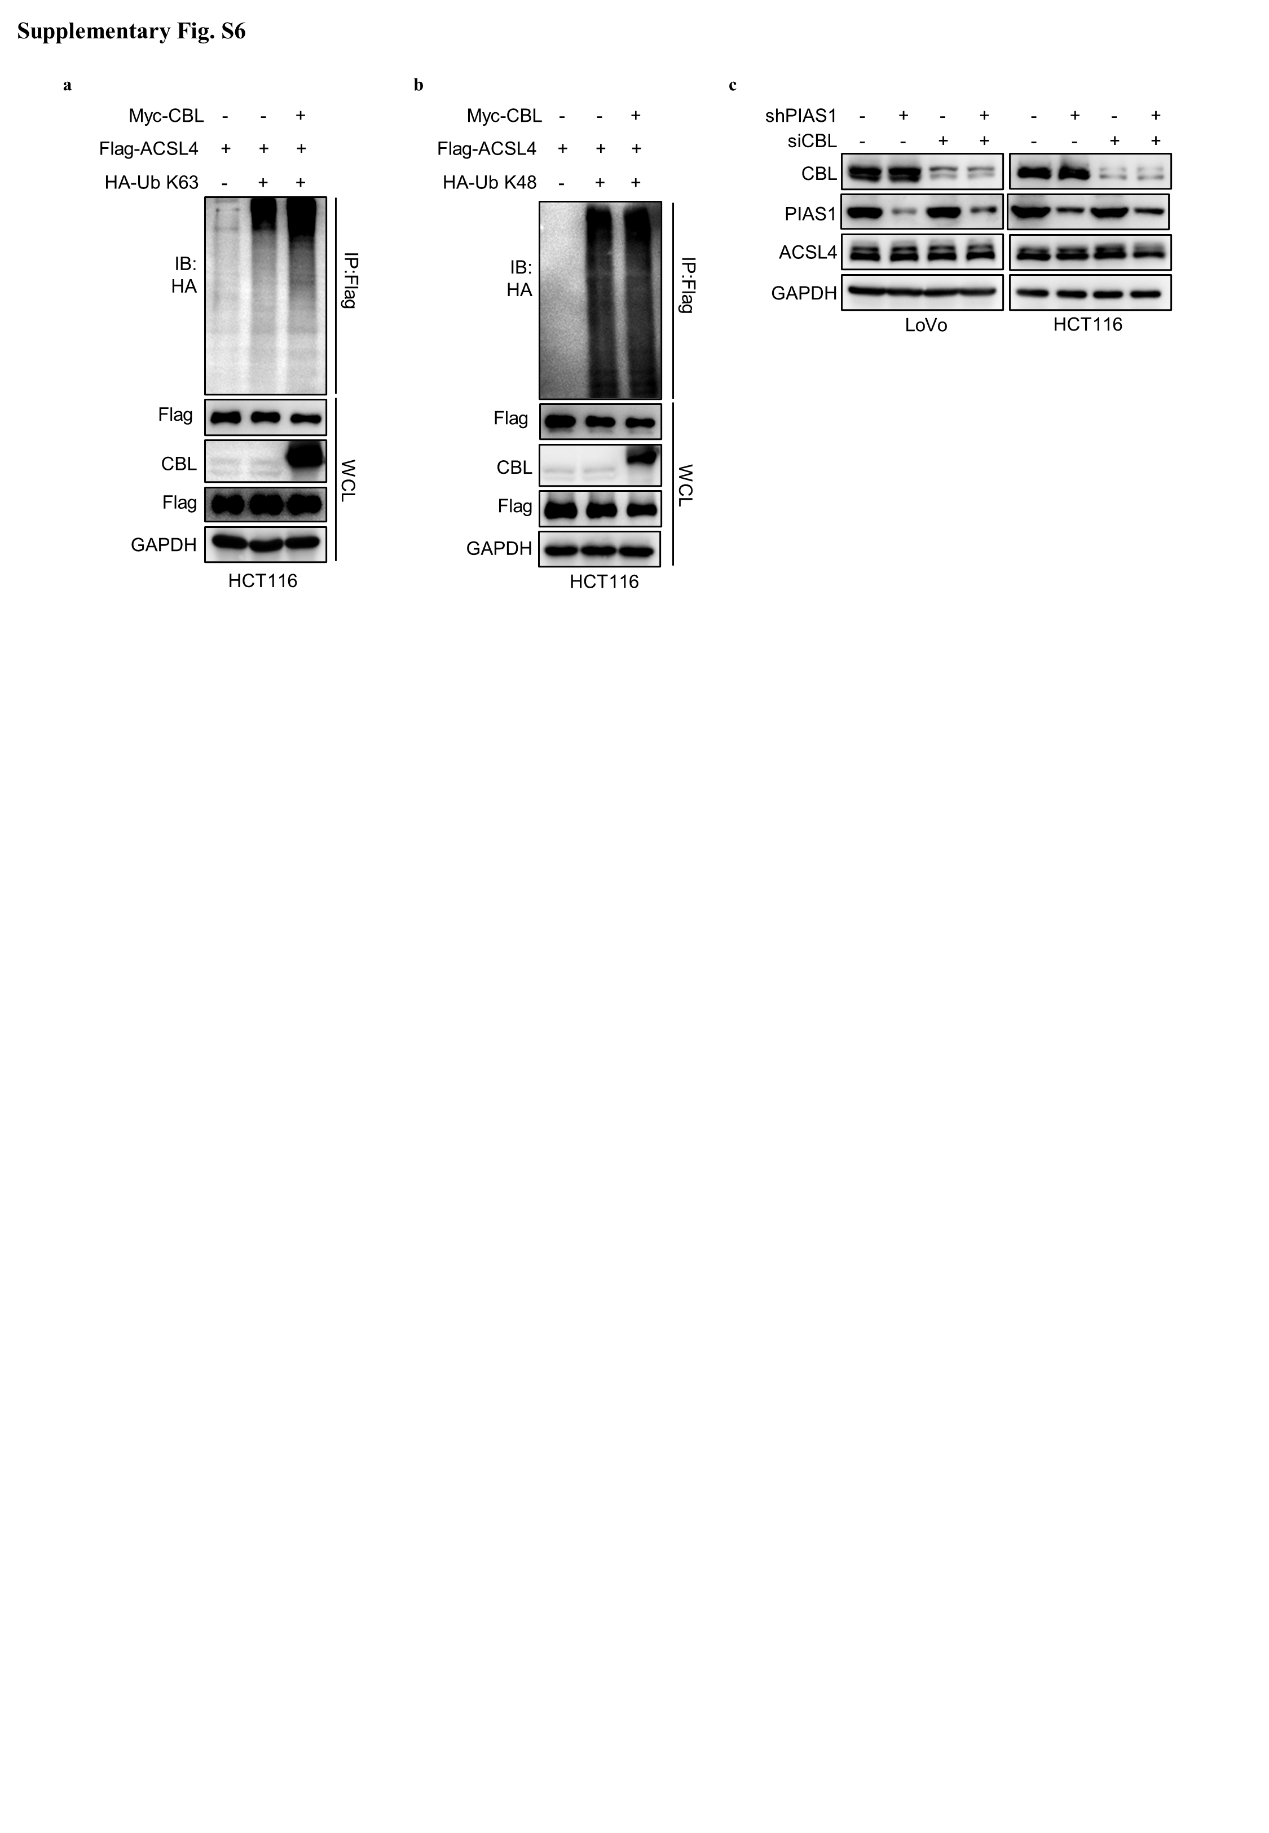
**

**Supplementary Fig. S6. CBL promotes ACSL4 dimerization to facilitate ferroptosis.** (a, b) HCT116 cells transfected with the indicated plasmids and treated with 10 μM MG132 for 8 h. IP with anti-Flag antibody and western blot with anti-HA antibody were performed to detect the ubiquitination level of ACSL4.(c) Western blot analysis of indicated LoVo and HCT116 cells.

**
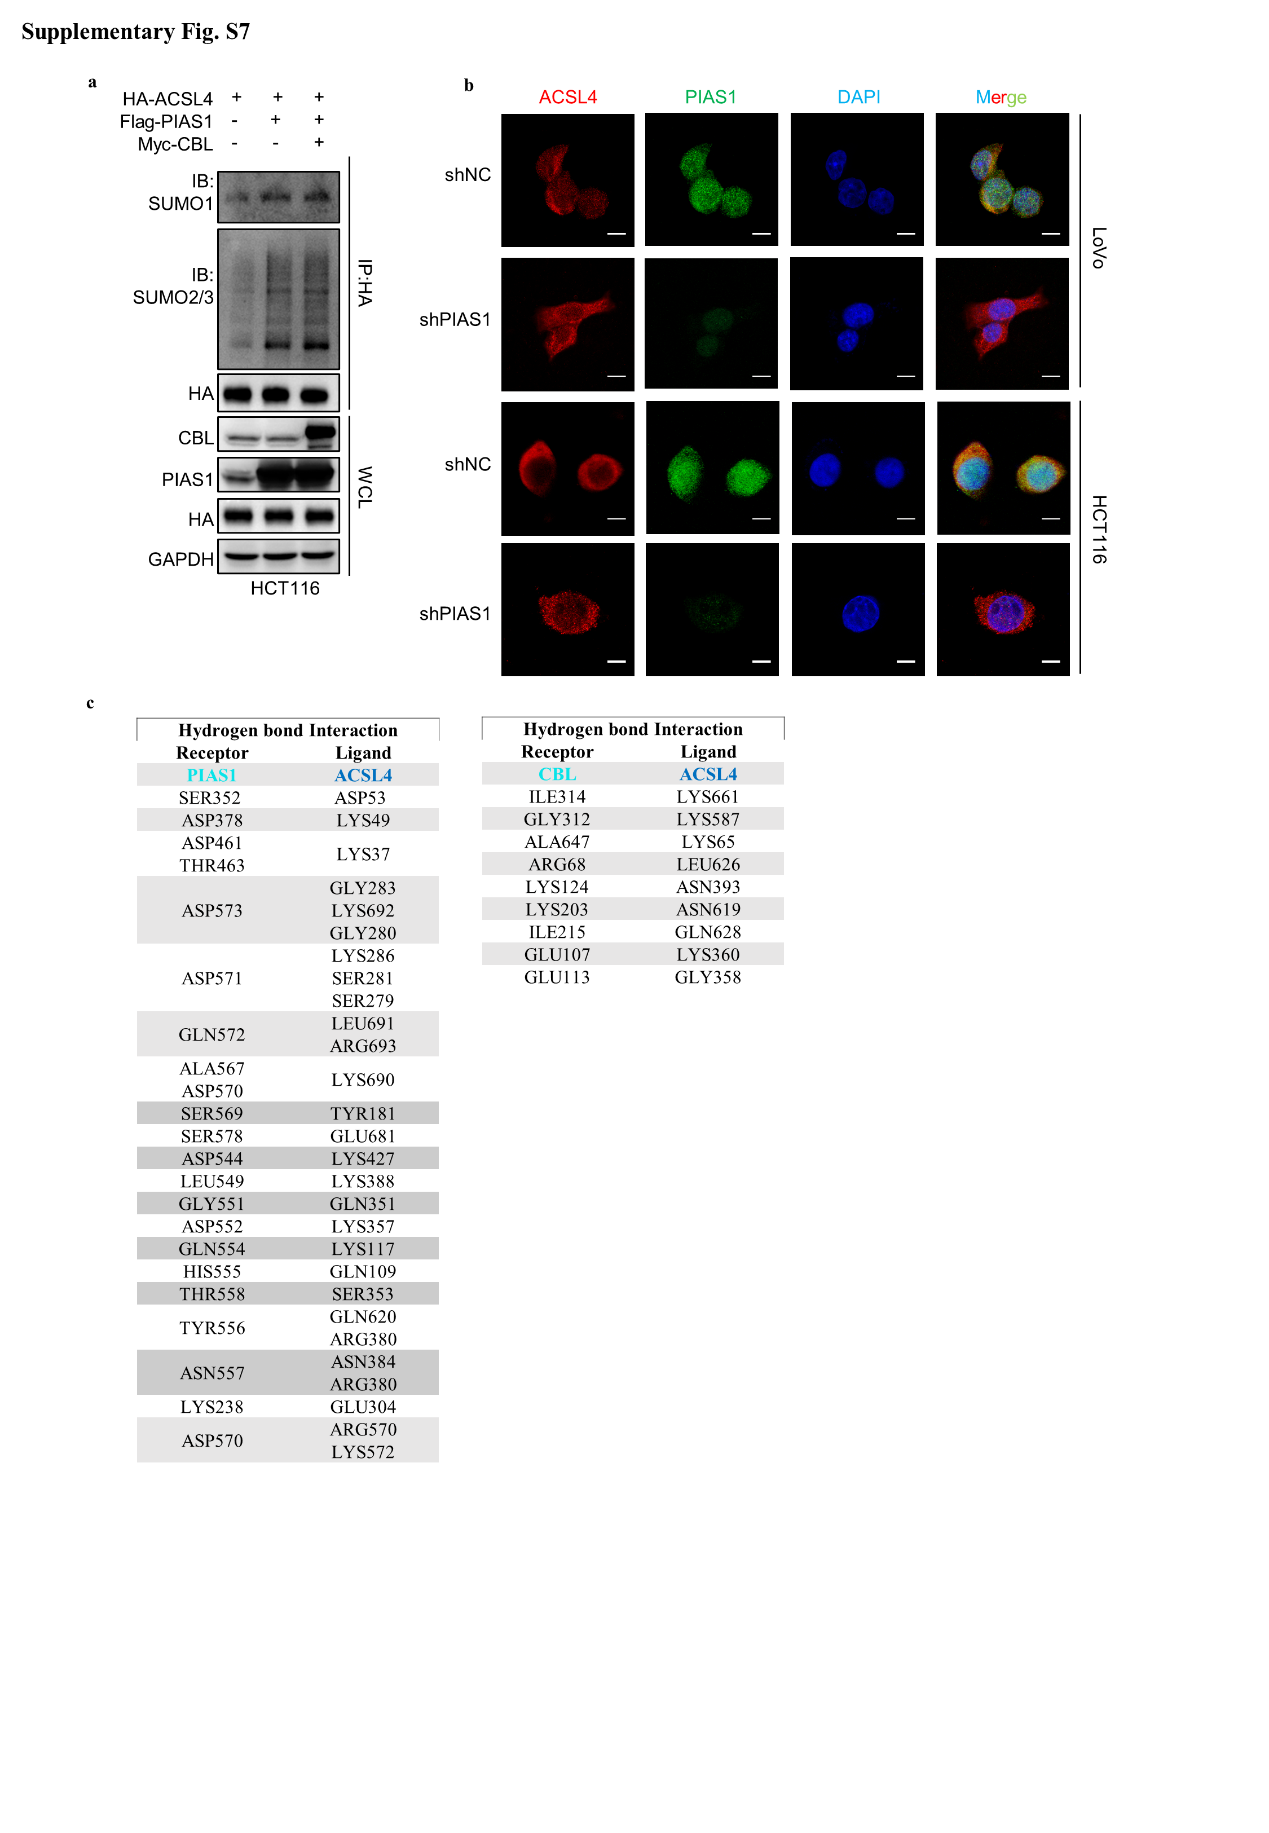
**

**Supplementary Fig. S7. PIAS1 competes with CBL for ACSL4 binding. (**a) HCT116 cells were transfected with the indicated plasmids. IP with anti-HA antibody and western blot with anti-SUMO1 and SUMO2/3 antibodies were performed to detect the SUMOylation level of ACSL4.(b) IF staining was performed to assess changes in the colocalization of ACSL4 (red) and PIAS1 (green) in shNC and shPIAS1 LoVo and HCT116 cells. Nuclei were counterstained with DAPI (blue). Scale bar, 20 μm. **(**c) Predicted hydrogen bond interactions between ACSL4 and PIAS1 or CBL. PIAS1–ACSL4 (left); CBL–ACSL4 (right).


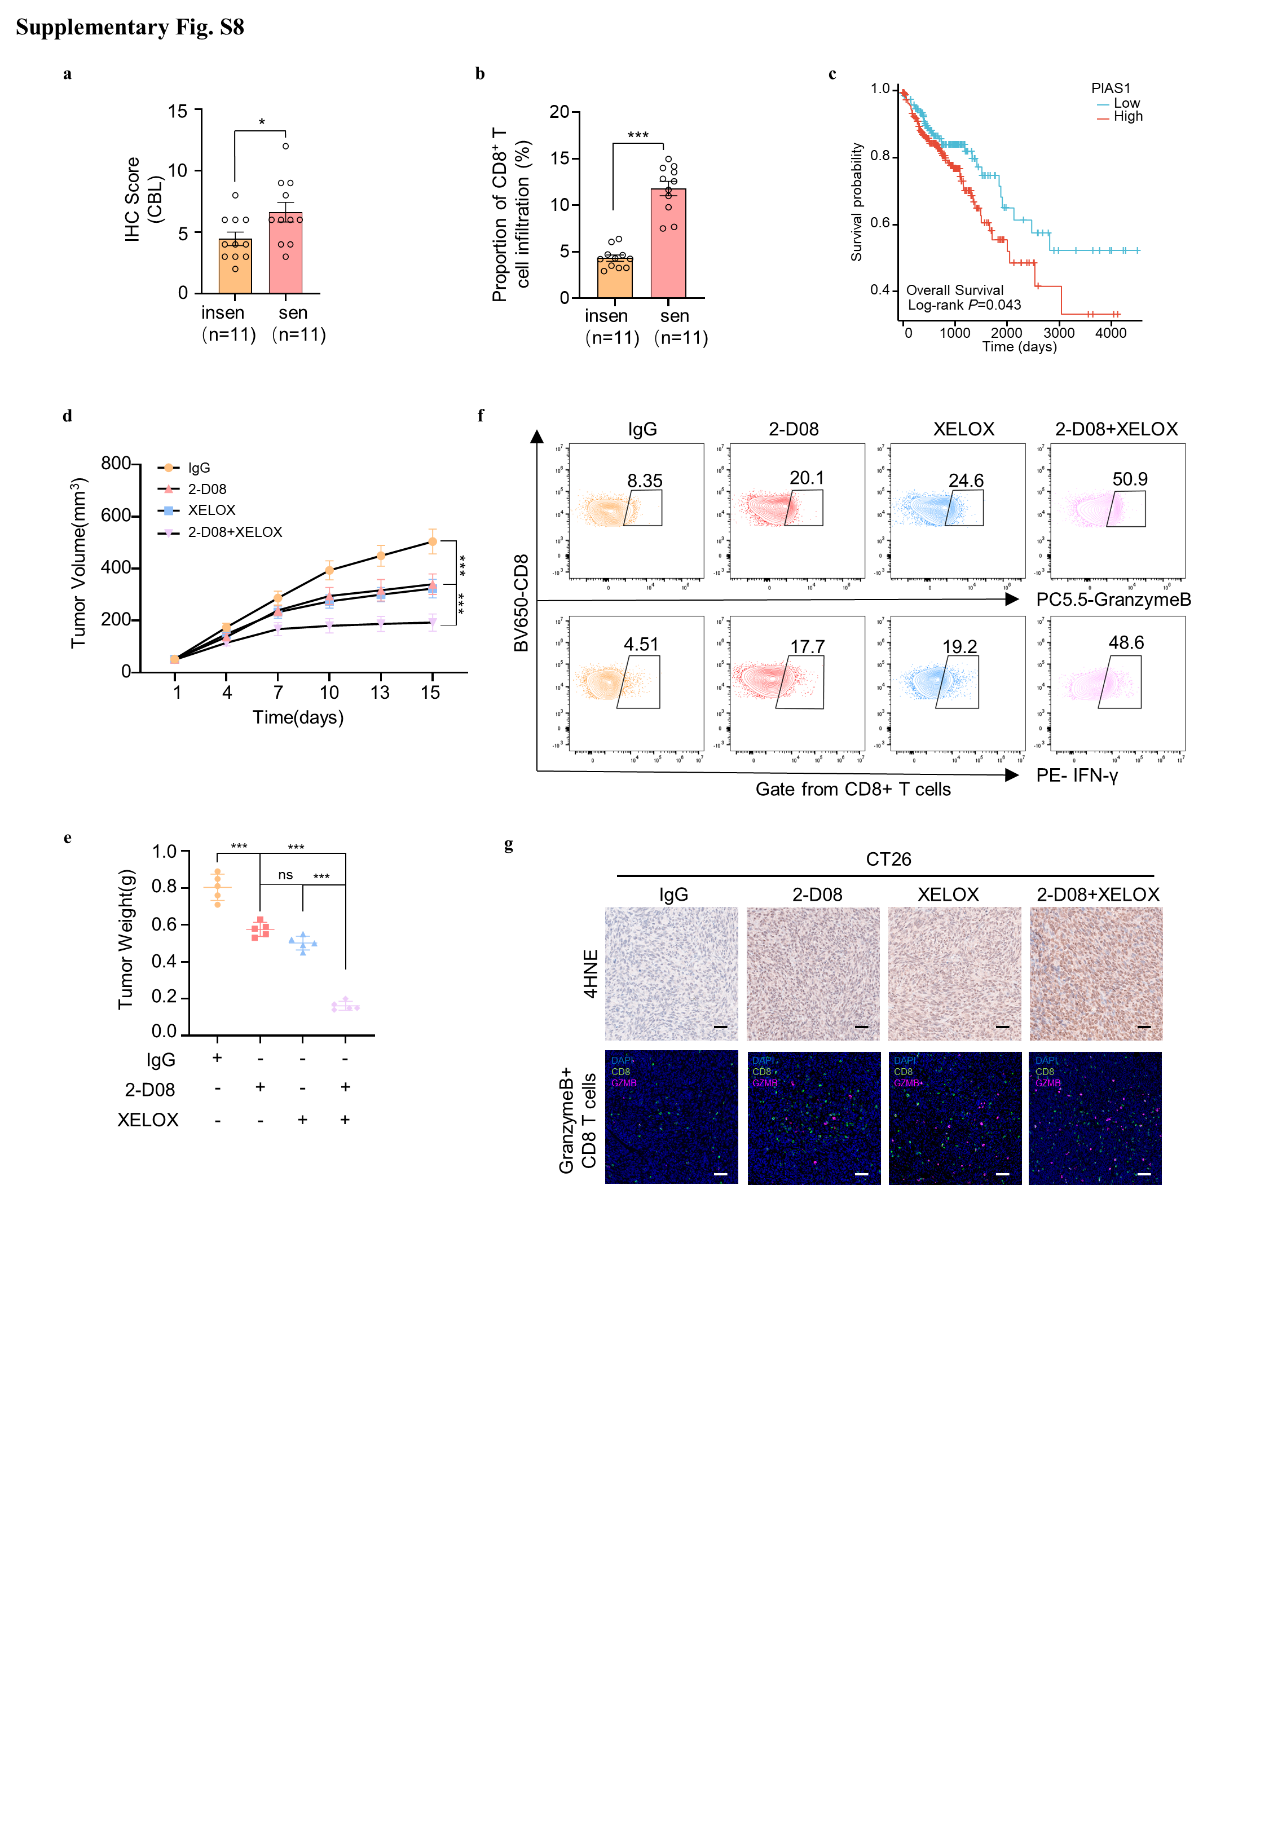


**Supplementary Fig. S8. Targeting SUMOylation sensitizes CRC to chemoimmunotherapy****.** (a) CBL IHC staining scores were evaluated in CRC tissues (n = 22). (b) The proportion of CD8⁺ T-cell infiltration in CRC tissues quantified by IF analysis (n = 22). (c) Kaplan–Meier analysis of overall survival in TCGA-COAD & READ according to PIAS1 expression. Log-rank test, *p* = 0.043. (d, e) CT26 cells were subcutaneously implanted into BALB/c mice and treated as indicated. Tumor growth curves are shown in (d), and tumor weights at the endpoint are shown in (e). (f) Representative dot plots of mouse CD8⁺ T cells showing granzyme B (upper) and IFN-γ (lower) expression after the indicated treatments. The proportions of IFN-γ⁺ and granzyme B⁺ CD8⁺ T-cell are quantified in Figure 8i and j (n = 5 independent experiments). (g) Representative IHC images of 4-HNE and IF images of granzyme B⁺ CD8⁺ T-cells in CT26 subcutaneous tumors from (Fig 8h). Scale bars, 20 μm. Data are presented as mean ± SEM. In (a) and (b), Comparisons were made by using a two-tailed Student’s t-test. **p* < 0.05; ****p* < 0.001. In (d) and (e), Comparisons were made by using one-way ANOVA with Tukey’s test. **p* < 0.05, ****p* < 0.001

| **Supplementary Table 1. The information of patients** |
| --- |

| **ID** | **Gender** | **Age** | **TNM stage** | **Response Evaluation** |
| --- | --- | --- | --- | --- |
| 60017583070 | Male | 67 | T3N1M0 | SD |
| 60016181008 | Male | 56 | T3N1M0 | SD |
| 60015083960 | Male | 62 | T2N0M0 | SD |
| 60017581714 | Female | 62 | T4N0M0 | SD |
| 60017241005 | Male | 59 | T3N0M0 | SD |
| 60018058734 | Male | 63 | T3N0M0 | SD |
| 60017472992 | Male | 63 | T3N1M0 | PD |
| 60017352127 | Male | 59 | T4NxM0 | PD |
| 60011062772 | Female | 39 | T3N2M1 | PD |
| 60013884670 | Male | 33 | T4N0M0 | PD |
| 60017626753 | Male | 55 | T3N1M1 | PD |
| 60017539760 | Male | 46 | T3N2M0 | PR |
| 60011058578 | Female | 53 | T1N0M0 | PR |
| 60017326780 | Male | 27 | T3N0M0 | PR |
| 60011999630 | Male | 60 | T3N0M0 | PR |
| 60017516389 | Male | 53 | T3N0M0 | PR |
| 60017403321 | Male | 38 | T3N0M0 | PR |
| 60017951890 | Male | 54 | T2N0M0 | PR |
| 60014439043 | Male | 43 | T2N0M0 | PR |
| 60017291443 | Male | 55 | T4N0M0 | PR |
| 60017688846 | Male | 60 | T1N0M0 | PR |
| 60017149743 | Male | 38 | T3N0M0 | PR |

| **Supplementary Table 2. The sequence of siRNAs, shRNAs and sgRNAs** |
| --- |

| **siRNAs** | **Sequence** |
| --- | --- |
| siCBL#1 | TACGTATGAAGCAATGTATAATA |
| siCBL#2 | TGGAGAATTTGATGAAGAAAACT |
| siPJA1#1 | CAGCAATTACCTTGAAGAAGTTC |
| siPJA1#2 | TGGCAAGTTTAAAGATGATAAGC |
| siTRIM9#1 | TTCACTTCAACAGCACATACAAC |
| siTRIM9#2 | GAGGTGATTAAGGAAAATGATCC |
| siTRIM25#1 | GACCTTGAAGGAGGAGATTGAAC |
| siTRIM25#2 | CAGCAAGTTTGACACCATTTATC |
| siTRIM33#1 | ACCTCTATTGCCATGAATTAAGT |
| siTRIM33#2 | AGCTTTTCAGGAGGTGTAAAACA |
| siCBLL1#1 | GACAAGATATAGACCGTATTACC |
| siCBLL1#2 | AGCATGTTTTTTGCTATGACTGT |
| siARIH1#1 | CAGTCCATTATCTTTGAGAATAA |
| siARIH1#2 | GTCCAATATCCTGATGCTAAACC |
| siRNF25#1 | CAGCACATATGTGAGAAGATTCC |
| siRNF25#2 | AGGAAATTCTCACAGATAACAAC |
| siRBBP6#1 | TGGGCATAAGCAGGAATCAGAGC |
| siRBBP6#2 | AACTACAAAAGCAATTGATGACT |
| siPIAS1#1 | AAGGTCATTCTAGAGCTTTATTT |
| siPIAS1#2 | CGAATGAACTTGGCAGAAATTT |
| **shRNAs** | **Sequence** |
| shPIAS1#1 | GTGGAAGCTGAAATGCGTGTA |
| shPIAS1#2 | ACTATTCCATGGCAGTATATC |
| shPIAS1#3 | CCGGATCATTCTAGAGCTTTA |
| shPias1#1 | GCTACCATTCTATGACCTGTT |
| shPias1#2 | CCTTATGACTTACAAGGATTA |
| shPias1#3 | GCAGAAATTGGAAGAACCTAT |
| **sgRNAs** | **Sequence** |
| sgACSL4#1 | CACC-GGAACAGCAGCCATAAGTGTNGG |
| sgACSL4#2 | CACC-GAGATATCTTGCTTTACCTANGG |
| sgACSL4#3 | CACC-GAATTATCTTACCCCAGTCCNGG |
| sg*Acsl4* #1 | CACC-GGGTTCTACGGGCCGCCCCAA |
| sg*Acsl4* #2 | CACC-GTGGTTCTACGGGCCGCCCCA |
| sg*Acsl4* #3 | CACC-GACCGATCACAATCTCACCTC |

| **Supplementary Table 3. The prime used to construct the plasmids** |
| --- |

| Plasmid | Forward Prime | Reverse Prime |
| --- | --- | --- |
| ACSL4 K661R | TGCCATGagaTTGGAGCGATTTGAAATTCCAA | GCTCCAAtctCATGGCATTTGCAGCTTCTCGA |
| ACSL4 K532R | CCATGGGATATTTTagaAATGAAGAGAAAACAGCAGAAG | tctAAAATATCCCATGGAGATGTTCTGTCCAC |
| PIAS1 C351S | GTGTCGGGCCCTTACAAGTTCTCATCTACAATGTT | AACATTGTAGATGAGAACTTGTAAGGGCCCGACAC |
